1 Short communication

2

3 **Defensive forwards: stress-responsive proteins in cell walls of crop plants**

4

5 Liangjie Niu, Wei Wang\*

6

7 *National Key Laboratory of Wheat & Maize Crop Science, College of Life Sciences, Henan*

8 *Agricultural University, Zhengzhou 450002, China*

9

10 *\*Corresponding author. Wei Wang, College of Life Sciences, Henan Agricultural University,*

11 *Zhengzhou 450002, China. E-mail:wangwei@henau.edu.cn*

12 **ABSTRACT**

13 As the vital component of plant cell wall, proteins play important roles in stress response  
14 through modifying wall structure and involving in wall integrity signaling. However, the  
15 potential of cell wall proteins (CWPs) in improvement of crop stress tolerance has probably  
16 been underestimated. Recently, we have critically reviewed the predictors, databases and  
17 cross-referencing of subcellular locations of possible CWPs in plants (*Briefings in*  
18 *Bioinformatics* 2018;19:1130-1140). In this study, taking maize (*Zea mays*) as an example,  
19 we retrieved 1873 entries of probable maize CWPs recorded in UniProtKB. As a result, 863  
20 maize CWPs are curated and classified as 59 kinds of protein families. By referring to GO  
21 annotation and gene differential expression in Expression Atlas, we highlight the potential of  
22 CWPs as defensive forwards in abiotic and biotic stress responses. In particular, several  
23 CWPs are found to play key roles in adaptation to many stresses. String analysis also reveals  
24 possibly strong interactions among many CWPs, especially those stress-responsive enzymes.  
25 The results allow us to narrow down the list of CWPs to a few specific proteins that could be  
26 candidates to enhance maize resistance.

27 **Keywords:** Cell wall proteins (CWPs); stress-responsive proteins; abiotic and biotic stresses;  
28 stress-resistant crops; *Zea mays*

## 29 **1. Introduction**

30 Crop plants, especially cereals such as wheat, rice and maize, are the main source for food  
31 and feed worldwide. In nature, crops are often suffering from abiotic and biotic stresses,  
32 which adversely affect plant growth, development and eventually production. Therefore,  
33 developing stress-resistant crops is crucial for global food security [1].

34 The major abiotic stresses that limit maize production includes drought, heat, cold and  
35 flooding [2,3]. Maize yield decreases sharply when the plants are exposed to high  
36 temperature (>29°C), particularly in the USA and in northern China [4]. Maize is sensitive to  
37 flooding at seedling stage; about 25~30% annual yield loss is caused by flooding in India  
38 alone [5]. It is often plagued by insect pests (e.g., corn borer and nematode) and fungal  
39 invasion [6,7]. Alone the fungus *Colletotrichum graminicola*, which induces maize  
40 anthracnose, is responsible for annual loss of up to one billion dollars in the USA [8].

41 In response, plants have developed the sophisticated mechanisms to adapt to both abiotic  
42 and biotic stresses, such as forming structural barriers and recruiting chemical compounds.  
43 As the outermost layer facing the environments, the cell wall provides stability and  
44 protection to the plants and is involved in stress perception [9,10]. The role of plant cell wall  
45 in stress response is increasingly emphasized, especially the surveillance of its structure is  
46 closely associated with innate immunity in plants [11]. Notably, cell wall proteins (CWPs)  
47 have been implied in various stresses through modifying wall structure and involving in wall  
48 integrity signaling [12,13]. However, the potential of CWPs in crop improvement of stress  
49 tolerance has probably been underestimated.

50 The composition of cell walls varies with plant species, cell type and developmental stage.  
51 Pectin, cellulose and hemicellulose are the main components (>90%) of the primary cell wall,  
52 whereas cellulose, hemicellulose and lignin are dominant in the secondary wall [14]. Despite  
53 present in minor amounts (5–10% of the primary cell wall mass), CWPs are actively

54 involved in cell wall integrity signaling and innate immunity during plant development and  
55 adaptation to environmental cues [12,13]. Most CWPs are basic proteins with a signal  
56 peptide and are post-translationally modified, especially by hydroxylation, N-glycosylation  
57 and O-glycosylation [14]. After synthesis in the cytosol, CWPs are targeted to the cell wall  
58 and/or the extracellular space via the secretory pathways from endoplasmic reticulum (ER)  
59 and Golgi apparatus to the cell wall [15].

60 Identification and cloning of resistance genes is an important prerequisite for targeted  
61 breeding of stress-resistance crops, especially through genome editing technologies. To date,  
62 only a small number of resistance genes have been identified and modulated in transgenic  
63 maize to enhance resistance and improve production [16-21]. All these known resistance  
64 genes encode intracellular proteins [22], whereas CWPs have not yet been targeted for crop  
65 improvement of stress tolerance. However, many experimental data suggest the role of  
66 CWPs in stress response. For example, proteomic analysis in rice and chickpea revealed that  
67 many different abundance proteins in extracellular space may be involved in various cellular  
68 processes, e.g. cell wall modification, metabolism, signal transduction, cell defense and  
69 rescue [23,24].

70 Over the past 10 years, genome sequencing [25,26] and high-throughput profiling  
71 analyses [27-29] in maize have generated huge amounts of CWPs data that have been stored  
72 in public databases, especially in the UniProt Knowledgebase (UniProtKB). In this study, we  
73 have performed the bioinformatic analysis of CWPs in maize. Our results highlight the  
74 potential of CWPs as defensive forwards in stress adaptation. It may provide candidates for  
75 targeted improvement of stress resistance in maize and other crops.

## 76 **2. Methods**

### 77 *2.1 Retrieving possible maize CWPs entries*

78 UniProtKB is the central hub for the collection of functional information on proteins, with

79 accurate, consistent and rich annotation [30]. Protein entries in UniProtKB have either been  
80 confirmed with experimental evidence at protein level or are entirely predicted. Search of  
81 UniProtKB with the keyword ‘*Zea mays*+ cell wall or apoplast or secreted protein’  
82 (December 1, 2019) retrieved 1873 entries of possible maize CWPs, with only 50 curated  
83 entries. Notably, many sequences were over-represented in UniProtKB, because the fact that  
84 different maize lines have been sequenced and submitted separately. Therefore, we have  
85 merged redundant sequences and only kept the entries with complete sequences. This applied  
86 equally to protein isoforms produced from a single gene.

## 87 *2.2 Curating possible maize CWPs entries*

88 We curated the subcellular locations of all maize CWPs entries retrieved from UniProtKB.  
89 Only a small number of the entries are annotated with definite localizations in cell wall  
90 and/or extracellular spaces, whereas the majority of the records are computationally analyzed  
91 and have no localization annotations. For the latter entries, we predicted their locations with  
92 the software HybridGO-Loc [31], as we previously recommended [15]. Only those with  
93 definite locations of cell wall or extracellular space were retained for further analysis. For  
94 uncharacterized proteins with definite locations of cell wall or extracellular space, BLAST  
95 was run against UniProtKB to find their homologues for functional assignment. The gene  
96 differential expression of maize CWPs was referred to Expression Atlas  
97 (<https://www.ebi.ac.uk/gxa/>).

## 98 *2.3 Protein-protein interaction analysis*

99 Protein-protein interaction networks were analyzed using the publicly available program  
100 STRING (<http://string-db.org/>). STRING is a database of known and predicted  
101 protein-protein interactions.

## 102 **3. Results and Discussion**

103 The cell wall proteome consists mainly of *strict sensu* CWPs present only in the wall and

104 secreted proteins present in the extracellular space (**Fig. 1A**). Inside a plant, the space  
105 outside the plasma membrane can be defined as the apoplast where material can diffuse  
106 freely. Gene Ontology (GO) definitions of CWPs include cell wall (GO:0005618) protein,  
107 apoplast (GO:0048046) protein or secreted protein. Thus, apoplast proteins represent the  
108 generalized CWPs. To an extent, cell wall, apoplast and extracellular space are partially  
109 overlapping in scope and include related proteins.

110 After thorough curation, the maize CWPs dataset included 863 entries (Supplementary  
111 Table S1), belonging to 56 kinds of protein families (Supplementary Table S2). We  
112 functionally classified maize CWPs (**Fig. 1B**) by referring to functional classes of  
113 Arabidopsis CWPs [14,32]. According to the number of entries, the top 10 families are  
114 expansin (109), pectinesterase (108), xyloglucan endotransglucosylase/hydrolase (XTH) (80),  
115 peroxidase (82), polygalacturonase (69), pectin acetyltransferase (66),  $\alpha$ -L-arabinofuranosidase  
116 (64), pectin lyase (51), germin-like proteins (42), and galactosidase (27). Some members of  
117 different families are highly similar, such as chitinase (D0EM57) and endochitinase (P29022)  
118 (96.44% identity), non-classical arabinogalactan protein (A0A3L6FGF2) and pistil-specific  
119 extensin-like protein (B6UHE3) (99.58% identity).

120 Notably, 36 kinds of the CWPs represent various enzymes, implied in various  
121 physiological or biological processes, especially cell wall organization (including  
122 polysaccharide biogenesis, degradation and modification), protein proteolysis, cell redox  
123 homeostasis, and abiotic and biotic stress responses. Moreover, STRING analysis implied that  
124 maize CWPs participate in MAPK and Wnt signaling pathways. It is suggested that MAPK  
125 and Wnt signaling pathways may play pivotal roles in linking perception of external stimuli  
126 with changes in cellular organization or gene expression [33].

127 The importance of the CWPs that function in cell wall organization is obvious because  
128 polysaccharides constitute the largest components of plant cell walls and are constantly

129 subjected to remodeling during plant development or in response to environmental cues.  
130 Likewise, glycoside hydrolase family proteins are very important due to their activities to  
131 hydrolyze chitin (a primary component of fungus cell walls) to confer resistance to fungus.  
132 In addition, the importance of several oxidoreductases (e.g. L-ascorbate oxidase, malate  
133 dehydrogenase, peroxidase, and polyamine oxidase) was expected in maintaining cell redox  
134 homeostasis that may subjected to change under various stresses [34].

135 Regarding subcellular localizations, 32 kinds of the CWPs exist only in the cell wall, 11  
136 only in the extracellular space, and 13 both in the cell wall and the extracellular space. The  
137 CWPs present in the cell wall, such as structural proteins, may interact with other wall  
138 components by non-covalent linkages to form insoluble networks [35]. The CWPs present in  
139 the extracellular space, especially between the cell plasma membrane and the cuticle in aerial  
140 organs or the suberin layer in roots, may confer to the plant surface waterproof qualities and  
141 protection against biotic and abiotic stresses [36,37]. In addition, many CWPs, such as  
142 peroxidase (A5H8G4), malate dehydrogenase (B4FRJ1), peroxiredoxin (B6T2Y1), purple  
143 acid phosphatase (B4FR72), NADH-cytochrome b5 reductase (B6TCK3),  
144 carbohydrate-binding-like fold (A0A1D6FHT0) and peroxiredoxin (B6T2Y1), also have  
145 intracellular locations.

146 It should be noted that the 863 entries of maize CWPs collected here are sufficiently  
147 representative. By comparison, the WallProtDB, a specialized collection of cell wall  
148 proteomic data [38], records only 2,170 protein sequences from 11 different plant species  
149 (without maize). In particular, the 270 entries of rice CWPs in the WallProtDB, belonging to  
150 46 kinds of protein families, are homologous with the corresponding maize CWPs.  
151 Undoubtedly, the list of maize CWPs entries remains incomplete. For example,  
152 pectinesterase, endoglucanase and endoxylanase inhibitors are pathogenesis-related proteins  
153 found in cereals and dicots [39], but only maize pectinesterase/pectinesterase inhibitor

154 (A0A1D6KNZ1) are retrieved from UniProtKB. This is possibly due to the difficulty in  
155 proteomic analysis of the CWPs and the lack of complete annotation of all sequenced genes.  
156 With the technical advance in cell wall isolation, proteomic analysis of maize cell walls will  
157 identify more the ‘missing’ CWPs.

158 To summarise the potential functions of maize CWPs, we checked gene differential  
159 expression of maize CWPs in Expression Atlas (<https://www.ebi.ac.uk/gxa/>). Analysis of the  
160 inducible genes suggested that 36 kinds of maize CWPs are implied with a definite role in  
161 various biotic and abiotic stresses (**Table 1**, Supplementary Table S3). In particular, at least  
162 ten CWPs are simultaneously involved in 5-7 kinds of stresses, including germin-like protein  
163 (B4FAV5), UDP-arabinopyranose mutase (P80607),  $\beta$ -fructofuranosidase (P49174),  
164 chitinase (D0EM57), peptidase A1 domain-containing protein (B4G1Q7), peroxidase 1  
165 (A5H8G4),  $\beta$ -D-xylosidase (B4F8R5), eukaryotic aspartyl protease (A0A1D6DSN9),  
166 NADH-cytochrome b5 reductase (B6TCK3), O-glycosyl hydrolase superfamily protein  
167 (K7V329), and subtilisin-like protease SBT2.6 (C0P6H8). Our analysis also revealed that  
168 maize may recruit a different set of CWPs (**Table 1**) to respond to abiotic and biotic stresses,  
169 although both stress responses may share common CWPs.

170 The roles of some CWPs in abiotic stresses have been proved in Arabidopsis and other  
171 plant species. Here we just referred some examples, because we did not aim to  
172 comprehensively review previous studies. In Arabidopsis, pectinesterase 1 acts as negative  
173 regulators of genes involved in salt stress response [40]; pectin methylesterase is required for  
174 guard cell function in response to heat [41]; purple acid phosphatase 17 is reducible by  
175 ABA(abscisic acid), H<sub>2</sub>O<sub>2</sub>, senescence, phosphate starvation and salt stress [42]. In rice,  
176  $\beta$ -galactosidase gene responds to ABA and water-stress [43] and germin-like proteins are  
177 associated with salt stress [44]. In other plants,  $\beta$ -galactosidase was found to be related to  
178 abiotic stress, especially heavy metals [45]; glycine-rich proteins [46,47] and cell wall



179 invertase (copper stress, [48]) are stress-induced. Stress upregulates the expression of  
180 expansins and xyloglucan-modifying enzymes that can remodel the wall under abiotic stress  
181 [49]. In *Medicago truncatula*, XTH respond to heavy metal mercury, salinity and drought  
182 stresses [50], possibly through incorporating newly deposited xyloglucan to strengthen cell  
183 walls. However, the role of similar CWPs in maize under abiotic stresses needs to be  
184 characterized.

185 Many maize CWPs are implied to play a role in response of plants to biotic stress. For  
186 example, aspartyl protease AED3 (B4FMW6) may be involved in systemic acquired  
187 resistance against fungal invasion. Transcription profiling revealed that its transcript  
188 (*Zm00001d027965*) was increased by a Log<sub>2</sub>-fold change of 4.3 in maize infected with  
189 *Ustilago maydis*. The role of some CWPs in biotic stress have been studied in different plant  
190 species. For example, chitinase and endochitinase A have antifungal activity against  
191 chitin-containing fungal pathogens [51,52]. Overexpressing extensin enhanced Arabidopsis  
192 resistance to *Pseudomonas syringae* by promoting cell wall stiffness [53]. Pectin-degrading  
193 enzymes (polygalacturonases, pectatylases, and pectinmethyl esterases) and  
194 xylan-degrading enzymes (endoxylanases) are key virulence factors for pathogens. As a  
195 counterattack, plants respond these attacks with a wide range of protein inhibitors of  
196 polysaccharide-degrading enzymes [54], e.g. maize pectinesterase/pectinesterase inhibitor  
197 (A0A1D6KNZ1) and XIP (xylanase inhibitor protein) [27]. In fruits, polygalacturonases and  
198 pectatylases contribute substantially to the softening of fruit. Suppression of these enzymes  
199 delays fruit softening and simultaneously confers enhanced resistance to pathogens like  
200 Botrytis [55,56].

201 As demonstrated in **Table 1**, many maize CWPs may have a role in both abiotic and biotic  
202 stress, such as aspartyl protease AED3, HRGPs,  $\beta$ -D-xylosidase, germin-like protein,  
203 peroxidase,  $\beta$ -fructofuranosidase etc. It is recognized that HRGPs play major roles in plant

204 defense against abiotic and pathogen attacks [57]. Arabidopsis  $\beta$ -fructofuranosidase (Q43866)  
205 is involved in defense to fungus, karrikins and wounding.

206 However, many maize CWPs did not imply to have significant roles in stress response,  
207 such as dirigent protein, expansin, heparanase-like protein, proline rich cell wall protein,  
208 exopolygalacturonase, heparanase-like protein 3 etc. However, the roles of dirigent protein  
209 and expansins in stress response have been suggested in Arabidopsis [58]. Heparanase  
210 activity is strongly implicated in structural remodeling of the extracellular matrix of animals,  
211 a process which can lead to invasion by tumor cells [59].

212 Many protein/protein interactions are expected in cell walls and between CWPs with those  
213 spanned in plasma membrane, not to mention leucine-rich repeat (LRR) family protein and  
214 pectinesterase/pectinesterase inhibitor enzymes that exist in maize cell walls. Recently, a  
215 spanning the plasma membrane protein ZmWAK that confers quantitative resistance to  
216 maize head smut, possibly acting as a receptor-like kinase to perceive and transduce  
217 extracellular signals [20]. String analysis revealed that many stress-responsive CWPs,  
218 especially chitinase,  $\beta$ -hexosaminidase, glycoside hydrolase,  $\alpha$ -galactosidase, pectinesterase,  
219 and  $\beta$ -fructofuranosidase may form strong-interaction networks in maize (**Fig. 2**). These  
220 stress-responsive CWPs can act as a frontline defense or involved in cell signaling process  
221 under abiotic and biotic stresses.

222 As the interface with the environment, the existing CWPs faces with intense selection  
223 pressure to evolve new functions or recruit new proteins to the apoplast through gene  
224 duplication and retargeting [60]. Genetic and transgenic evidence in Arabidopsis and other  
225 species supported that cell wall gene families associated with cell wall remodeling during  
226 abiotic stress and pathogen attack [9]. Therefore, the approach of modifying CWPs provides  
227 a novel and rational means of enhancing crop resistance.

228 At present, many CWPs are suggested as stress-responsive only based on the RNA-Seq

229 data. It was not clear if the protein abundance increased accordingly. So, their accumulation  
230 at protein level need to be validated under normal and stress conditions. Another possibility  
231 is that not all stress-responsive CWPs play a key role in stress tolerance. This highlights a  
232 need to extend genome editing technologies toward specific CWPs. Further molecular and  
233 genetic characterization of maize CWPs, especially those with intracellular localizations,  
234 will clarify their functions in mediating the plant response to various stresses. Importantly,  
235 specific protein abundance in cell walls may not be enough under high stress severity or  
236 where crop is exposed to multiple stresses like flooding, drought and diseases, thus  
237 enhancing stress-responsive CWPs in crop plants with gene transfer and genome editing is a  
238 straightforward approach to enhance crop resistance.

239 In conclusion, we highlight the potential role of stress-responsive CWPs as defensive  
240 forward in maize defense response to various stresses. After clarification of the functions of  
241 stress-responsive CWPs during growth, development and stress adaptation, specific CWPs  
242 can be candidates for application in genetic modification of stress tolerance in maize and  
243 other crops. This may have an important impact on global food security.

244

## 245 **FIGURE LEGENDS**

246 **Fig. 1.** Subcellular localizations highlighting cell wall and extracellular space (**A**) and major  
247 molecular functions (**B**) of the examples of maize CWPs. 1,  $\alpha$ -L-arabinofuranosidase 1; 2,  
248  $\alpha$ -L-fucosidase 2; 3, ankyrin repeat family protein; 4, aspartyl protease AED3; 5, auxin-induced  
249  $\beta$ -glucosidase; 6, basic endochitinase; 7,  $\beta$ -D-xylosidase; 8,  $\beta$ -fructofuranosidase; 9,  $\beta$ -glucosidase; 10,  
250  $\beta$ -hexosaminidase; 11, carbohydrate-binding-like fold; 12, cell wall invertase; 13, chitinase; 14,  
251 chitin-binding type-1 domain-containing protein; 15, dirigent protein; 16, DUF1005 family protein; 17,  
252 endochitinase; 18, eukaryotic aspartyl protease; 19, exopolysaccharidase; 20, expansin; 21,  
253  $\alpha$ -galactosidase; 22,  $\beta$ -galactosidase; 23, germin-like protein; 24, glycine-rich cell wall structural protein;  
254 25, glyco\_hydro\_19\_cat domain-containing protein; 26, glycoside hydrolase; 27, group 3 pollen allergen;

255 28, heparanase-like protein 3; 29, hydroxyproline-rich glycoprotein (HRGP); 30, leucine-rich repeat (LRR)  
256 family protein; 31, malate dehydrogenase; 32, NADH-cytochrome b5 reductase; 33, non-classical  
257 arabinogalactan protein 31; 34, nudix hydrolase domain-containing protein; 35, O-glycosyl hydrolase  
258 superfamily protein; 36, pectin acetyesterase; 37, pectin lyase; 38, pectin methylesterase 1; 39,  
259 pectinesterase; 40; pectinesterase/pectinesterase inhibitor; 41; pepsin A; 42, peptidase A1  
260 domain-containing protein; 43, peroxidase 1; 44, peroxiredoxin; 45, L-ascorbate oxidase; 46, polyamine  
261 oxidase 1; 47, polygalacturonase; 48, proline and lysine rich protein; 49, protein EXORDIUM-like 3; 50,  
262 purple acid phosphatase (PAP); 51, pyrroline-5-carboxylate reductase; 52, subtilisin-like protease SBT2.6;  
263 53, UDP-arabinopyranose mutase; 54, wall structural protein; 55, vegetative cell wall protein gp1; 56,  
264 xyloglucan endotransglucosylase/hydrolase.

265 **Fig. 2.** String analysis of possible protein-protein interaction among maize CWPs.

266

## 267 SUPPLEMENTARY MATERIAL

268 **Supplementary Table S1** Cell wall proteins of maize retrieved in UniProtKB

269 **Supplementary Table S2** Summary of GO annotation of maize CWPs and their gene  
270 differential expression

271 **Supplementary Table S3** Summary of GO annotation of representative maize CWPs and  
272 their gene differential expression

273

## 274 References

275 [1] Y. Eshed, Z.B. Lippman, Revolutions in agriculture chart a course for targeted breeding of old and new  
276 crops, *Science* 366 (2019) 6466

277 [2] M. Cooper, C. Ghore, R. Leafgren, T. Tang, C. Messina, Breeding drought-tolerant maize hybrids for the  
278 US corn-belt: Discovery to product, *J. Exp. Bot.* 65 (2014) 6191-6204

279 [3] A.K. Block, C.T. Hunter, S.E. Sattler, C. Rering, S. McDonald, G.J. Basset, S.A. Christensen, Fighting  
280 on two fronts: Elevated insect resistance in flooded maize, *Plant Cell Environ.* 43 (2019) 223-234

281 [4] W. Schlenker, M.J. Roberts. Nonlinear temperature effects indicate severe damages to U.S. crop yields

- 282 under climate change, Proc. Natl. Acad. Sci. USA 106 (2009)15594–15598
- 283 [5] P.H. Zaidi, P. Maniselvan, A. Srivastava, Genetic analysis of waterlogging tolerance in tropical maize  
284 (*Zea mays* L.), Maydica 55 (2010) 17–26
- 285 [6] T. Lodha, P. Hembram, N. Basak, Proteomics: A successful approach to understand the molecular  
286 mechanism of plant-pathogen interaction, Am. J. Plant Sci. 4 (2013) 1212–1226
- 287 [7] D.S. Mueller, K.A. Wise, A.J. Sisson, T.W. Allen, G.C. Bergstrom, D.B. Bosley, et al., Corn yield loss  
288 estimates due to diseases in the United States and Ontario, Canada from 2012 to 2015. Plant Health  
289 Progress 17 (2016) 211–222
- 290 [8] D. Balmer, V. Flors, G. Glauser, B. Mauch-Mani, Metabolomics of cereals under biotic stress: Current  
291 knowledge and techniques, Front. Plant Sci 4 (2013) 82
- 292 [9] K. Houston, M.R. Tucker, J. Chowdhury, N. Shirley, A. Little, The plant cell wall: A complex and  
293 dynamic structure as revealed by the responses of genes under stress conditions, Front. Plant Sci 7  
294 (2016) 984
- 295 [10] C. Kesten, A. Menna, C. Sánchez-Rodríguez, Regulation of cellulose synthesis in response to stress,  
296 Curr. Opin. Plant Biol. 40 (2017) 106-113
- 297 [11] D. Bellincampi, F. Cervone, V. Lionetti, Plant cell wall dynamics and wall-related susceptibility in  
298 plant-pathogen interactions, Front. Plant Sci. 5 (2014) 228
- 299 [12] A.A. Gust, R. Pruitt, T. Nümberger, Sensing danger: key to activating plant immunity, Trends Plant  
300 Sci. 22 (2017) 779-791
- 301 [13] L. Vaahtera, J. Schulz, T. Hamann, Cell wall integrity maintenance during plant development and  
302 interaction with the environment, Nat. Plants 5 (2019) 924-932
- 303 [14] C. Albenne, H. Canut, E. Jamet, Plant cell wall proteomics: the leadership of *Arabidopsis thaliana*,  
304 Front. Plant Sci. 4 (2013) 111
- 305 [15] X.L.Wu, Q.B. Zhang, Z.K. Wu, F.J. Tai, W. Wang, Subcellular locations of potential cell wall  
306 proteins in plants: predictors, databases and cross-referencing, Brief. Bioinformatics 19 (2018)  
307 1130-1140
- 308 [16] D.E. Nelson, P.P. Repetti, T.R. Adams, R.A. Creelman, J. Wu, et al., Plant nuclear factor Y (NF-Y) B  
309 subunits confer drought tolerance and lead to improved corn yields on water-limited acres, Proc. Natl.  
310 Acad. Sci. USA 104 (2007) 16450–16455

- 311 [17] L. Virilouvet, M.P. Jacquemot, D. Gerentes, H. Corti, S. Bouton, F. Gilard, et al., The ZmASR1  
312 protein influences branched-chain amino acid biosynthesis and maintains kernel yield in maize under  
313 water-limited conditions, *Plant Physiol.* 157 (2011) 917–936
- 314 [18] M.L. Nuccio, J. Wu, R. Mowers, H.P. Zhou, M. Meghji, L.F. Primavesi, et al., Expression of  
315 trehalose-6-phosphate phosphatase in maize ears improves yield in well-watered and drought  
316 conditions, *Nat. Biotechnol.* 33 (2015) 862-829
- 317 [19] J.E. Habben, X. Bao, N.J. Bate, J.L. DeBruin, D. Dolan, D. Hasegawa, et al., Transgenic alteration of  
318 ethylene biosynthesis increases grain yield in maize under field drought-stress conditions, *Plant*  
319 *Biotechnol. J.* 12 (2014) 685–693
- 320 [20] W. Zuo, Q. Chao, N. Zhang, J. Ye, G. Tan, B. Li, et al., A maize wall-associated kinase confers  
321 quantitative resistance to head smut, *Nat. Genet.* 47 (2015) 151-157
- 322 [21] X. Wang, H. Wang, S. Liu, A. Ferjani, J. Li, J. Yan, et al., Genetic variation in *ZmVPP1* contributes to  
323 drought tolerance in maize seedlings, *Nat. Genet.* 48 (2016) 1233-1241
- 324 [22] X. Wu, W. Wang, Increasing confidence of proteomics data regarding the identification of  
325 stress-responsive proteins in crop plants, *Front. Plant Sci.* 7(2016) 702
- 326 [23] D. Bhushan, A. Pandey, M.K. Choudhary, A. Datta, S. Chakraborty, N. Chakraborty, Comparative  
327 proteomics analysis of differentially expressed proteins in chickpea extracellular matrix during  
328 dehydration stress. *Mol. Cell. Proteomics* 6 (2007) 1868-1884
- 329 [24] A. Pandey, U. Rajamani, J. Verma, P. Subba, N. Chakraborty, A. Datta A, et al., Identification of  
330 extracellular matrix proteins of rice (*Oryza sativa* L.) involved in dehydration-responsive network: a  
331 proteomic approach, *J. Proteome Res.* 9 (2010) 3443-3464
- 332 [25] P.S. Schnable, D. Ware, R.S. Fulton, J.C. Stein, F. Wei, S. Pasternak, et al., The B73 maize genome:  
333 complexity, diversity, and dynamics, *Science* 326 (2009) 1112-1115
- 334 [26] Y. Jiao, P. Peluso, J. Shi, T. Liang, M.C. Stitzer, B. Wang, et al., Improved maize reference genome  
335 with single-molecule technologies, *Nature* 546 (2017) 524-527
- 336 [27] S. Chivasa, W.J. Simon, X.L. Yu, N. Yalpani, A.R. Slabas, Pathogen elicitor-induced changes in the  
337 maize extracellular matrix proteome, *Proteomics* 5 (2005) 4894–4904
- 338 [28] J. Zhu, S. Alvarez, E.L. Marsh, M.E. Lenoble, I.J. Cho, M. Sivaguru, et al., Cell wall proteome in the  
339 maize primary root elongation zone. II. Region-specific changes in water soluble and lightly ionically

- 340 bound proteins under water deficit, *Plant Physiol* 145 (2007) 1533-1548
- 341 [29] J. Zheng, J. Fu, M. Gou, J. Huai, Y. Liu, M. Jian, et al., Genome-wide transcriptome analysis of two  
342 maize inbred lines under drought stress, *Plant Mol. Biol.* 72 (2009) 407-421
- 343 [30] M. Schneider, UniProt Consortium, S. Poux, UniProtKB amid the turmoil of plant proteomics  
344 research, *Front. Plant Sci.* 3 (2012) 270
- 345 [31] S. Wan, M.W. Mak, S.Y. Kung, HybridGO-Loc: mining hybrid features on gene ontology for  
346 predicting subcellular localization of multi-location proteins, *PLoS ONE* 9 (2014) e89545
- 347 [32] E. Jamet, C. Albenne, G. Boudart, M. Irshad, H. Canut, R. Pont-Lezica, Recent advances in plant cell  
348 wall proteomics, *Proteomics* 8 (2008) 893-908
- 349 [33] G. Taj, P. Agarwal, M. Grant, A. Kumar, MAPK machinery in plants. Recognition and response to  
350 different stresses through multiple signal transduction pathways, *Plant Signal. Behav.* 5 (2010)  
351 1370-1378
- 352 [34] F. Passardi, C. Penel, C. Dunand, Performing the paradoxical: how plant peroxidases modify the cell  
353 wall, *Trends Plant Sci.* 9 (2004) 534-540
- 354 [35] S. Spadoni, O. Zabolina, A. Di Matteo, J.D. Mikkelsen, F. Cervone, G. De Lorenzo, et al.,  
355 Polygalacturonase-inhibiting protein interacts with pectin through a binding site formed by four  
356 clustered residues of arginine and lysine, *Plant Physiol.* 141 (2006) 557-564
- 357 [36] R. Thomas, X. Fang, K. Ranathunge, T.R. Anderson, C.A. Peterson, M.A. Bernards, Soybean root  
358 suberin: anatomical distribution, chemical composition, and relationship to partial resistance to  
359 *Phytophthora sojae*, *Plant Physiol.* 144 (2007) 299-311
- 360 [37] M. Javelle, V. Vernoud, P.M. Rogowsky, G.C. Ingram, Epidermis: the formation and functions of a  
361 fundamental plant tissue, *New Phytol.* 189 (2010)17-39
- 362 [38] H. San Clemente, E. Jamet, WallProtDB, A database resource for plant cell wall proteomics, *Plant*  
363 *Methods* 11 (2015) 2
- 364 [39] H. Goesaer, G. Elliott, P.A. Kroon, K. Gebruers, C.M. Courtin, J. Robben, et al., Occurrence of  
365 proteinaceous endoxylanases inhibitors in cereals, *Biochim, Biophys, Acta* 1696 (2004) 193–202
- 366 [40] M.T. Creighton, A. Kolton, A.R.A. Kataya, J. Maple-Grødem, I.O. Averkina, B. Heidari, et al.,  
367 Methylation of protein phosphatase 2A-Influence of regulators and environmental stress factors, *Plant*  
368 *Cell Environ.* 40 (2017) 2347-2358

- 369 [41] H.C. Wu, Y.C. Huang, L. Stracovsky, T.L. Jinn, Pectin methylesterase is required for guard cell  
370 function in response to heat. *Plant Signal. Behav.* 12 (2017) e1338227
- 371 [42] J.C. del Pozo, I. Allona, V. Rubio, A. Leyva, A. de la Pena, C. Aragoncillo, et al., A type 5 acid  
372 phosphatase gene from *Arabidopsis thaliana* is induced by phosphate starvation and by some other  
373 types of phosphate mobilising/oxidative stress conditions, *Plant J.* 19 (1999) 579-589
- 374 [43] J. Mundy, N.H. Chua, Abscisic acid and water-stress induce the expression of a novel rice gene,  
375 *EMBO J.* 17 (1988) 2279-2286
- 376 [44] J. Banerjee, S. Gantait, M.K. Maiti, Physiological role of rice germin-like protein 1 (OsGLP1) at  
377 early stages of growth and development in indica rice cultivar under salt stress condition, *Plant Cell*  
378 *Tiss. Organ Cult.* 131 (2017) 127-137
- 379 [45] O.M. Atrooz, M.H. Abukhalil, I.M. AlRawashdeh, Characterization of  $\beta$ -galactosidase in the crude  
380 plant extract of *Artemisia judaica* L. in presence and absence of some heavy metals, *Amer. J. Life Sci.*  
381 4 (2016) 99-105
- 382 [46] C. Ringli, B. Keller, U. Ryser, Glycine-rich proteins as structural components of plant cell walls, *Cell*  
383 *Mol. Life Sci.* 58 (2001) 1430-1441
- 384 [47] A. Mangeon, R.M. Junqueira, G. Sachetto-Martins, Functional diversity of the plant glycine-rich  
385 proteins superfamily, *Plant Signal. Behav.* 5 (2010) 99-104
- 386 [48] Z.R. Xu, S.W. Cai, W.X. Huang, R.X. Liu, Z.T. Xiong, Differential expression of vacuolar and  
387 defective cell wall invertase genes in roots and seeds of metalliferous and non-metalliferous  
388 populations of *Rumex dentatus* under copper stress, *Ecotoxicol. Environ. Safe* 147 (2017) 17-25
- 389 [49] R. Tenhaken, Cell wall remodeling under abiotic stress, *Front. Plant Sci.* 5 (2014) 771
- 390 [50] Y. Xuan, Z.S. Zhou, H.B. Li, Z.M. Yang, Identification of a group of XTHs genes responding to  
391 heavy metal mercury, salinity and drought stresses in *Medicago truncatula*, *Ecotox. Environ. Safe* 132  
392 (2016) 153-163
- 393 [51] Q.K. Huynh, C.M. Hironaka, E.B. Levine, C.E. Smith, J.R. Borgmeyer, D.M. Shah, Antifungal  
394 proteins from plants, Purification, molecular cloning, and antifungal properties of chitinases from  
395 maize seed, *J. Biol. Chem.* 267 (1992) 6635-6640
- 396 [52] M. Volpicella, C. Leoni, I. Fanizza, M. Distaso, G. Leoni, L. Farioli, et al., Characterization of maize  
397 chitinase-A, a tough allergenic molecule, *Allergy* 72 (2017) 1423-1429



- 398 [53] G. Wei, A.H. Shirsat, Extensin over-expression in Arabidopsis limits pathogen invasiveness, Mol.  
399 Plant Pathol. 7 (2006) 579–592
- 400 [54] N. Juge, Plant protein inhibitors of cell wall degrading enzymes, Trends Plant Sci. 11 (2006) 359-367
- 401 [55] D. Cantu, A.R. Vicente, J.M. Labavitch, A.B. Bennett, A.L.T. Powell, Strangers in the matrix: plant  
402 cell walls and pathogen susceptibility, Trends Plant Sci. 13 (2008) 610–617
- 403 [56] H. Liu, Y. Ma, N. Chen, S.Y. Guo, H.L. Liu, X.Y. Guo, et al., Overexpression of stress-inducible  
404 OsBURP16, the  $\beta$  subunit of polygalacturonase 1, decreases pectin content and cell adhesion and  
405 increases abiotic stress sensitivity in rice, Plant Cell Environ. 37 (2014) 1144–1158
- 406 [57] S. Deepak, S. Sekhar, R. Kini, A. Muck, A. Mithöfer, S.H. Shetty, Hydroxyproline-rich glycoproteins  
407 and plant defence, J. Phytopathol. 158 (2010) 585-593
- 408 [58] P. Marowa, A.M. Ding, Y.Z. Kong, Expansins: roles in plant growth and potential applications in  
409 crop improvement, Plant Cell Rep. 35 (2016) 949-965
- 410 [59] L. Fux, N. Ilan, R.D. Sanderson, I. Vlodaysky, Heparanase: busy at the cell surface, Trends Biochem.  
411 Sci. 34 (2009) 511-519
- 412 [60] J.K.C. Rose, S.J. Lee, Straying off the highway: Trafficking of secreted plant proteins and complexity  
413 in the plant cell wall proteome, Plant Physiol. 153 (2010) 433-436

414  
415  
416  
417  
418  
419  
420  
421  
422  
423  
424  
425  
426  
427  
428  
429  
430  
431  
432  
433  
434

**Table 1** Subcellular localizations of stress-responsive CWPs

| Stress                | Subcellular localizations                                                 |                                                                     |               |
|-----------------------|---------------------------------------------------------------------------|---------------------------------------------------------------------|---------------|
|                       | Cell wall                                                                 | Cell wall & extracellular                                           | Extracellular |
| <b>Abiotic stress</b> |                                                                           |                                                                     |               |
| Drought               | ③ ⑦ ⑫ ⑮ ⑲ ⑳ ㉑ ㉒ ㉓ ㉔ ㉕ ㉖ ㉗ ㉘ ㉙ ㉚ ㉛ ㉜ ㉝ ㉞ ㉟ ㊱ ㊲ ㊳ ㊴ ㊵ ㊶ ㊷ ㊸ ㊹ ㊺ ㊻ ㊼ ㊽ ㊾ ㊿   | ④ ⑧ ⑬ ⑯ ㉑ ㉒ ㉓ ㉔ ㉕ ㉖ ㉗ ㉘ ㉙ ㉚ ㉛ ㉜ ㉝ ㉞ ㉟ ㊱ ㊲ ㊳ ㊴ ㊵ ㊶ ㊷ ㊸ ㊹ ㊺ ㊻ ㊼ ㊽ ㊾ ㊿ | ㉞             |
| Salinity              | ㉞ ㉟                                                                       |                                                                     |               |
| Heat                  | ⑦ ⑨ ⑬ ㉑ ㉒ ㉓ ㉔ ㉕ ㉖ ㉗ ㉘ ㉙ ㉚ ㉛ ㉜ ㉝ ㉞ ㉟ ㊱ ㊲ ㊳ ㊴ ㊵ ㊶ ㊷ ㊸ ㊹ ㊺ ㊻ ㊼ ㊽ ㊾ ㊿         | ④ ㉑ ㉒ ㉓ ㉔ ㉕ ㉖ ㉗ ㉘ ㉙ ㉚ ㉛ ㉜ ㉝ ㉞ ㉟ ㊱ ㊲ ㊳ ㊴ ㊵ ㊶ ㊷ ㊸ ㊹ ㊺ ㊻ ㊼ ㊽ ㊾ ㊿       | ⑬             |
| Cold                  | ③ ⑤ ⑨ ⑲ ㉑ ㉒ ㉓ ㉔ ㉕ ㉖ ㉗ ㉘ ㉙ ㉚ ㉛ ㉜ ㉝ ㉞ ㉟ ㊱ ㊲ ㊳ ㊴ ㊵ ㊶ ㊷ ㊸ ㊹ ㊺ ㊻ ㊼ ㊽ ㊾ ㊿       | ④ ⑧ ⑬ ㉑ ㉒ ㉓ ㉔ ㉕ ㉖ ㉗ ㉘ ㉙ ㉚ ㉛ ㉜ ㉝ ㉞ ㉟ ㊱ ㊲ ㊳ ㊴ ㊵ ㊶ ㊷ ㊸ ㊹ ㊺ ㊻ ㊼ ㊽ ㊾ ㊿   |               |
| Flooding              | ⑤ ⑦ ⑮ ㉑ ㉒ ㉓ ㉔ ㉕ ㉖ ㉗ ㉘ ㉙ ㉚ ㉛ ㉜ ㉝ ㉞ ㉟ ㊱ ㊲ ㊳ ㊴ ㊵ ㊶ ㊷ ㊸ ㊹ ㊺ ㊻ ㊼ ㊽ ㊾ ㊿         | ④ ⑧ ㉑ ㉒ ㉓ ㉔ ㉕ ㉖ ㉗ ㉘ ㉙ ㉚ ㉛ ㉜ ㉝ ㉞ ㉟ ㊱ ㊲ ㊳ ㊴ ㊵ ㊶ ㊷ ㊸ ㊹ ㊺ ㊻ ㊼ ㊽ ㊾ ㊿     | ⑬             |
| Acidic soil           | ① ⑩ ⑮ ㉑ ㉒ ㉓ ㉔ ㉕ ㉖ ㉗ ㉘ ㉙ ㉚ ㉛ ㉜ ㉝ ㉞ ㉟ ㊱ ㊲ ㊳ ㊴ ㊵ ㊶ ㊷ ㊸ ㊹ ㊺ ㊻ ㊼ ㊽ ㊾ ㊿         | ④ ⑧ ㉑ ㉒ ㉓ ㉔ ㉕ ㉖ ㉗ ㉘ ㉙ ㉚ ㉛ ㉜ ㉝ ㉞ ㉟ ㊱ ㊲ ㊳ ㊴ ㊵ ㊶ ㊷ ㊸ ㊹ ㊺ ㊻ ㊼ ㊽ ㊾ ㊿     | ⑬             |
| <b>Biotic stress</b>  |                                                                           |                                                                     |               |
| Fungus                | ① ⑤ ⑦ ⑨ ⑩ ⑫ ⑮ ㉑ ㉒ ㉓ ㉔ ㉕ ㉖ ㉗ ㉘ ㉙ ㉚ ㉛ ㉜ ㉝ ㉞ ㉟ ㊱ ㊲ ㊳ ㊴ ㊵ ㊶ ㊷ ㊸ ㊹ ㊺ ㊻ ㊼ ㊽ ㊾ ㊿ | ④ ⑧ ㉑ ㉒ ㉓ ㉔ ㉕ ㉖ ㉗ ㉘ ㉙ ㉚ ㉛ ㉜ ㉝ ㉞ ㉟ ㊱ ㊲ ㊳ ㊴ ㊵ ㊶ ㊷ ㊸ ㊹ ㊺ ㊻ ㊼ ㊽ ㊾ ㊿     | ⑥ ⑬ ⑰ ㉞       |
| Bacterium             | ㉞                                                                         |                                                                     |               |
| ECB larvae            | ① ㉑ ㉒ ㉓ ㉔ ㉕ ㉖ ㉗ ㉘ ㉙ ㉚ ㉛ ㉜ ㉝ ㉞ ㉟ ㊱ ㊲ ㊳ ㊴ ㊵ ㊶ ㊷ ㊸ ㊹ ㊺ ㊻ ㊼ ㊽ ㊾ ㊿             | ⑧ ㉑ ㉒ ㉓ ㉔ ㉕ ㉖ ㉗ ㉘ ㉙ ㉚ ㉛ ㉜ ㉝ ㉞ ㉟ ㊱ ㊲ ㊳ ㊴ ㊵ ㊶ ㊷ ㊸ ㊹ ㊺ ㊻ ㊼ ㊽ ㊾ ㊿       | ⑬             |
| Corn leaf aphids      | ⑤                                                                         | ㉑                                                                   |               |
| Nematode              | ⑦ ⑮ ㉑ ㉒ ㉓ ㉔ ㉕ ㉖ ㉗ ㉘ ㉙ ㉚ ㉛ ㉜ ㉝ ㉞ ㉟ ㊱ ㊲ ㊳ ㊴ ㊵ ㊶ ㊷ ㊸ ㊹ ㊺ ㊻ ㊼ ㊽ ㊾ ㊿           | ⑧ ㉑ ㉒ ㉓ ㉔ ㉕ ㉖ ㉗ ㉘ ㉙ ㉚ ㉛ ㉜ ㉝ ㉞ ㉟ ㊱ ㊲ ㊳ ㊴ ㊵ ㊶ ㊷ ㊸ ㊹ ㊺ ㊻ ㊼ ㊽ ㊾ ㊿       |               |

Note: the serial numbers represent the CWPs numbered in Figure 1 legend.

**A**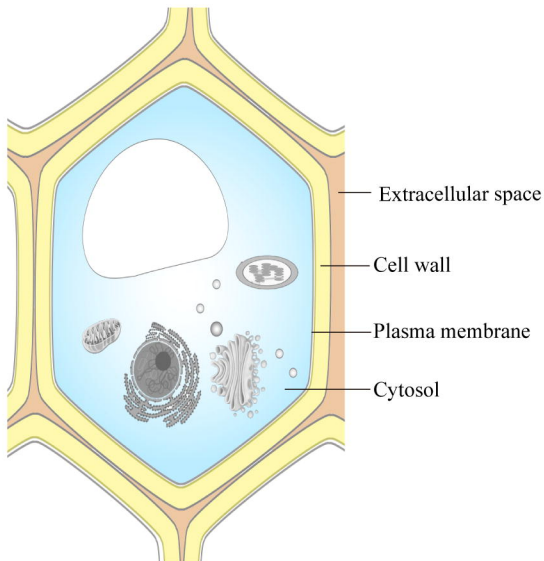**B**

| Molecular function                                                                                                                                                                                                              | CWPs                                            | Protein family                                                |
|---------------------------------------------------------------------------------------------------------------------------------------------------------------------------------------------------------------------------------|-------------------------------------------------|---------------------------------------------------------------|
| Enzyme ( $\alpha$ -L-arabinofuranosidase, $\alpha$ -L-fucosidase, $\beta$ -glucosidase, xylan 1,4- $\beta$ -xylosidase, $\beta$ -fructofuranosidase) activity in carbohydrate (arabinan, xylan, pectin, etc.) metabolic process | ① ② ⑤ ⑦ ⑧ ⑨<br>⑩ ⑫ ⑬ ⑭ ⑮ ⑯ ⑰ ⑱<br>⑲ ⑳ ㉑ ㉒ ㉓ ㉔ ㉕ | Glycoside hydrolase superfamily                               |
| Carbohydrate binding and modification                                                                                                                                                                                           | ⑳ ㉑ ㉒                                           | Pectinesterase family                                         |
| Structural constituent of cell wall                                                                                                                                                                                             | ㉑                                               | Expansin family                                               |
| Structural constituent of cell wall                                                                                                                                                                                             | ㉒ ㉓ ㉔ ㉕ ㉖ ㉗ ㉘                                   | Glycine-, hydroxyproline-, or proline and lysine-rich protein |
| Chitin catabolic process in defense response to <i>fungus</i>                                                                                                                                                                   | ⑥ ⑬ ⑭ ⑰ ㉑                                       | Glycoside hydrolase superfamily                               |
| Protein metabolic process (binding, proteolysis)                                                                                                                                                                                | ③                                               | Ankyrin repeat family protein                                 |
| Oxidoreductase activity in cell redox homeostasis                                                                                                                                                                               | ④ ⑧ ⑩ ⑫ ㉑<br>⑪ ⑬ ⑭ ⑮ ⑯ ㉑<br>㉑                   | Peptidase                                                     |
| Oxidoreductase activity in cell redox homeostasis                                                                                                                                                                               | ⑪ ⑬ ⑭ ⑮ ⑯ ㉑<br>㉑                                | Dehydrogenase oxidase, reductase, peroxidase, etc.            |
| Signaling process                                                                                                                                                                                                               | ㉑                                               | Leucine-rich repeat (LRR) family protein                      |
| Miscellaneous functions                                                                                                                                                                                                         | ⑪ ⑬ ⑰ ⑲ ㉑ ㉒<br>㉓ ㉔ ㉕ ㉖ ㉗ ㉘                      | Various proteins                                              |

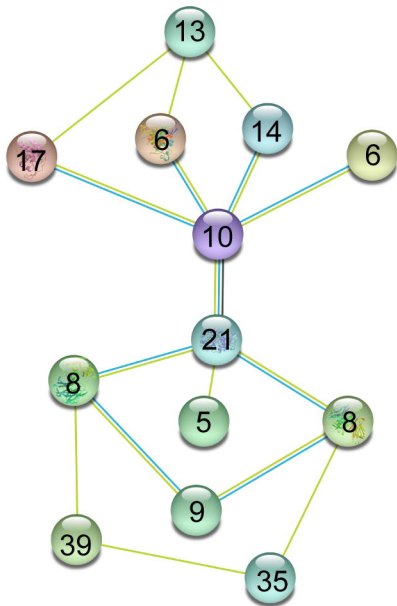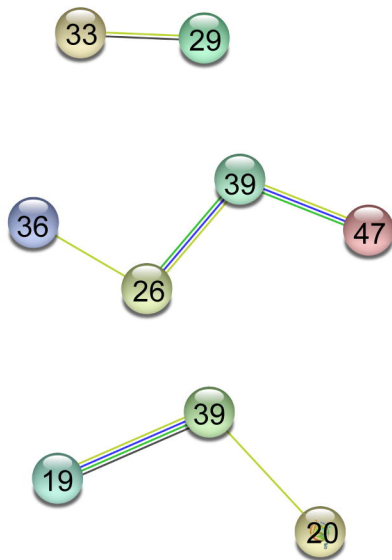

- ⑤ Auxin-induced beta-glucosidase
- ⑥ Basic endochitinase
- ⑧ Beta-fructofuranosidase
- ⑨ Beta-glucosidase
- ⑩ Beta-hexosaminidase
- ⑬ Chitinase
- ⑭ Chitin-binding type-1 domain-containing protein
- ⑰ Endochitinase
- ⑱ Exopolygalacturonase
- ⑳ Expansin-B11
- ㉑ Alpha-galactosidase
- ㉒ Glycoside hydrolase
- ㉓ Hydroxyproline-rich glycoprotein
- ㉔ Non-classical arabinogalactan protein 31
- ㉕ O-Glycosyl hydrolase
- ㉖ Pectin acetylesterase
- ㉗ Pectinesterase
- ㉘ Polygalacturonase
